# Supplementary material for: Visualizing symmetry-breaking electronic orders in epitaxial Kagome magnet FeSn films
Source: PubMed Central journal article supplement (PMC10550950; doi:10.1038/s41467-023-41831-4), 2023-10-04
Supplement: 41467_2023_41831_MOESM1_ESM.pdf [file 41467_2023_41831_MOESM1_ESM.pdf]

# Supplementary Information

## Visualizing symmetry-breaking electronic orders in epitaxial Kagome magnet FeSn films

Huimin Zhang<sup>1,2</sup>, Basu Dev Oli<sup>1</sup>, Qiang Zou<sup>1</sup>, Xu Guo<sup>3</sup>, Zhengfei Wang<sup>3</sup> and Lian Li<sup>1\*</sup>

<sup>1</sup>Department of Physics and Astronomy, West Virginia University, Morgantown, WV26506, USA

<sup>2</sup>State Key Laboratory of Structural Analysis, Optimization and CAE Software for Industrial Equipment, Dalian University of Technology, Dalian 116024, China

<sup>3</sup>Hefei National Research Center for Physical Sciences at the Microscale, CAS Key Laboratory of Strongly-Coupled Quantum Matter Physics, Department of Physics, Hefei National Laboratory, University of Science and Technology of China, Hefei, Anhui 230026, China

\*Correspondence to: [lian.li@mail.wvu.edu](mailto:lian.li@mail.wvu.edu)

This file includes Figures S1-19, including simulated STM images of the Sn- and Fe<sub>3</sub>Sn-terminated FeSn by DFT calculations (Figs. S6&7)

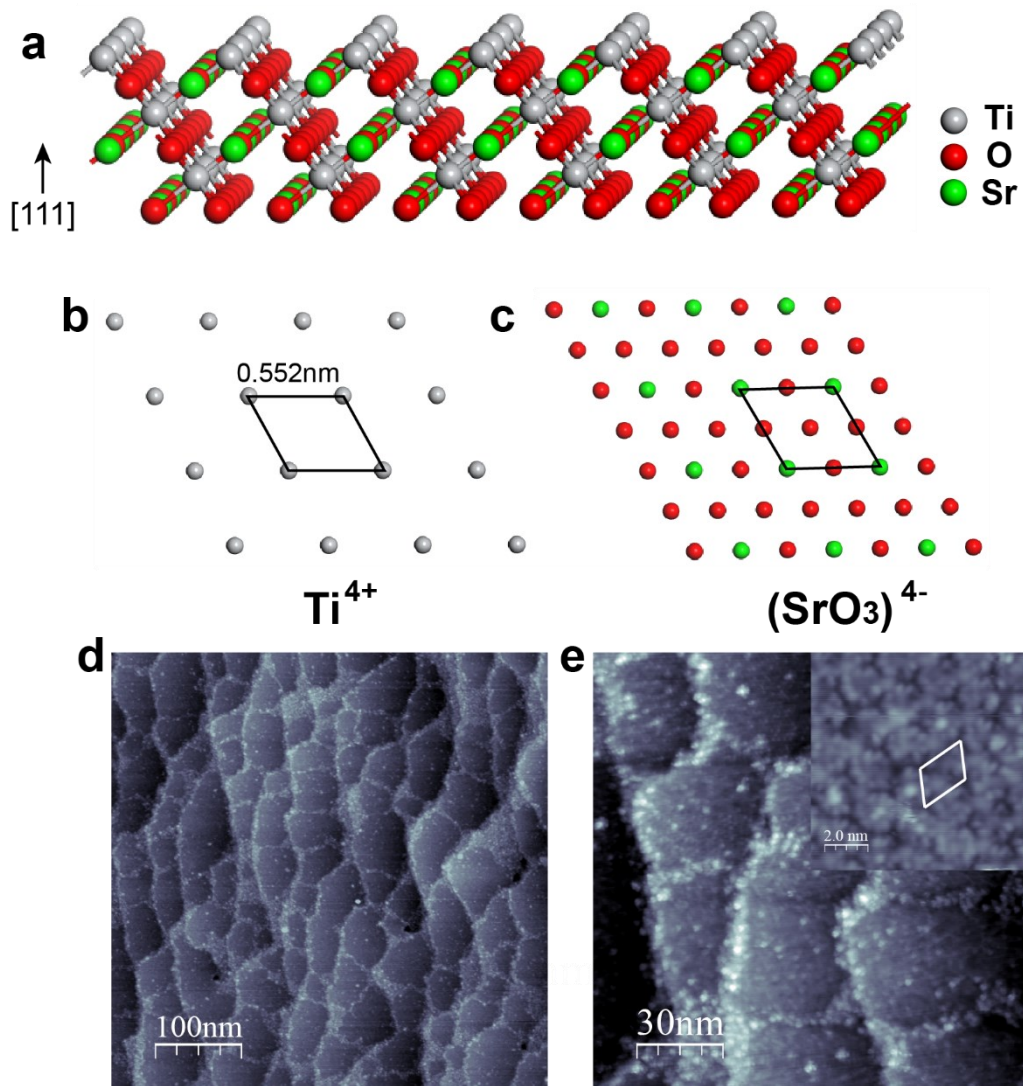

**Figure S1. STM imaging of the SrTiO<sub>3</sub>(111) substrate.** **a**, Ball-and-stick model of the SrTiO<sub>3</sub>(111) surface from side-view. **b-c**, Top-view of (Ti)<sup>4+</sup> and (SrO<sub>3</sub>)<sup>4-</sup> planes, respectively. **d**, Topographic STM image of thermally treated SrTiO<sub>3</sub>(111) substrate. Setpoint:  $V = 3.0$  V,  $I = 30$  pA. **e**, Zoom-in image revealing domain structure with a (4 × 4) reconstruction (Inset). Setpoint:  $V = 3.0$  V,  $I = 30$  pA and  $V = 1.0$  V,  $I = 500$  pA (inset).

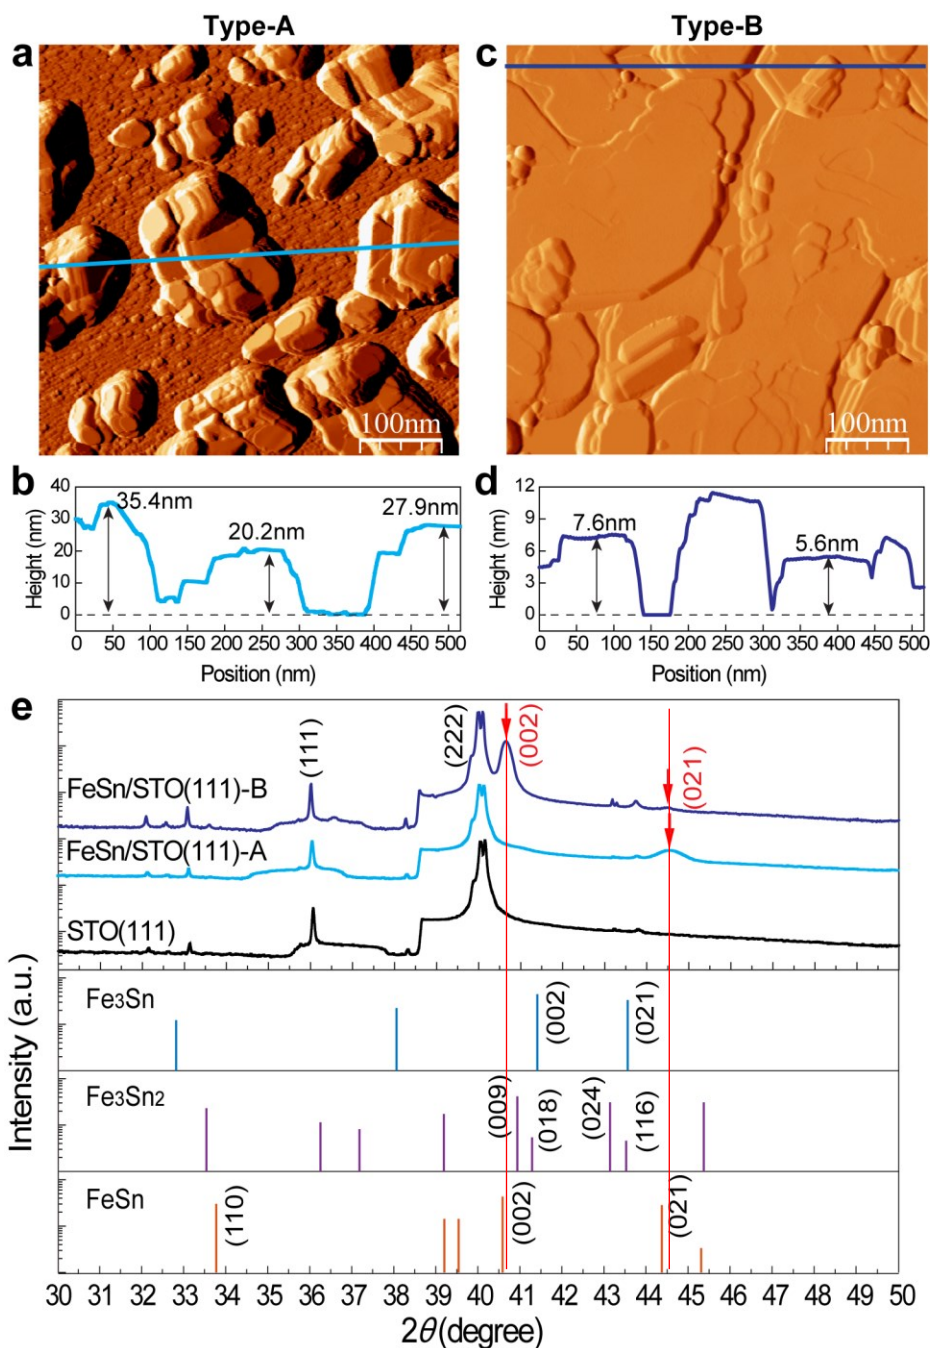

**Figure S2. X-ray diffraction (XRD) of the FeSn/SrTiO<sub>3</sub>(111) film.** **a**, Topographic STM image of Type-A FeSn/STO(111) film. Setpoint:  $V = 3.0$  V,  $I = 10$  pA. **b**, Line profile along the cyan line in **a**. **c**, Topographic STM image of a Type-B FeSn/STO(111) film. Setpoint:  $V = 1.0$  V,  $I = 100$  pA. **d**, Line profile along the blue line in **c**. **e**, XRD patterns for FeSn films on STO(111) substrate. Reference data are Fe<sub>3</sub>Sn (ICSD 24569), Fe<sub>3</sub>Sn<sub>2</sub> (ICSD 71), FeSn (ICSD 103634), and  $\alpha$ -Fe (ICSD 53451) from the Inorganic Crystal Structure Database. Here, we compare the XRD pattern with the references.

The peaks at  $2\theta = 40.52^\circ$  and  $44.58^\circ$  are indexed as FeSn (002) and (012), respectively, indicating the phase is FeSn. Type A films were grown in an MBE system that is interfaced with Unisoku low-temperature STM, where images,  $dI/dV$  spectra, and  $dI/dV$  maps were taken at 4.5 K. Type B films were grown in a separate standing-alone MBE chamber. Note that the FeSn (002) and (021) peaks are slightly shifted to higher values (marked by the two red lines), indicating a smaller lattice constant in the  $c$ -direction.

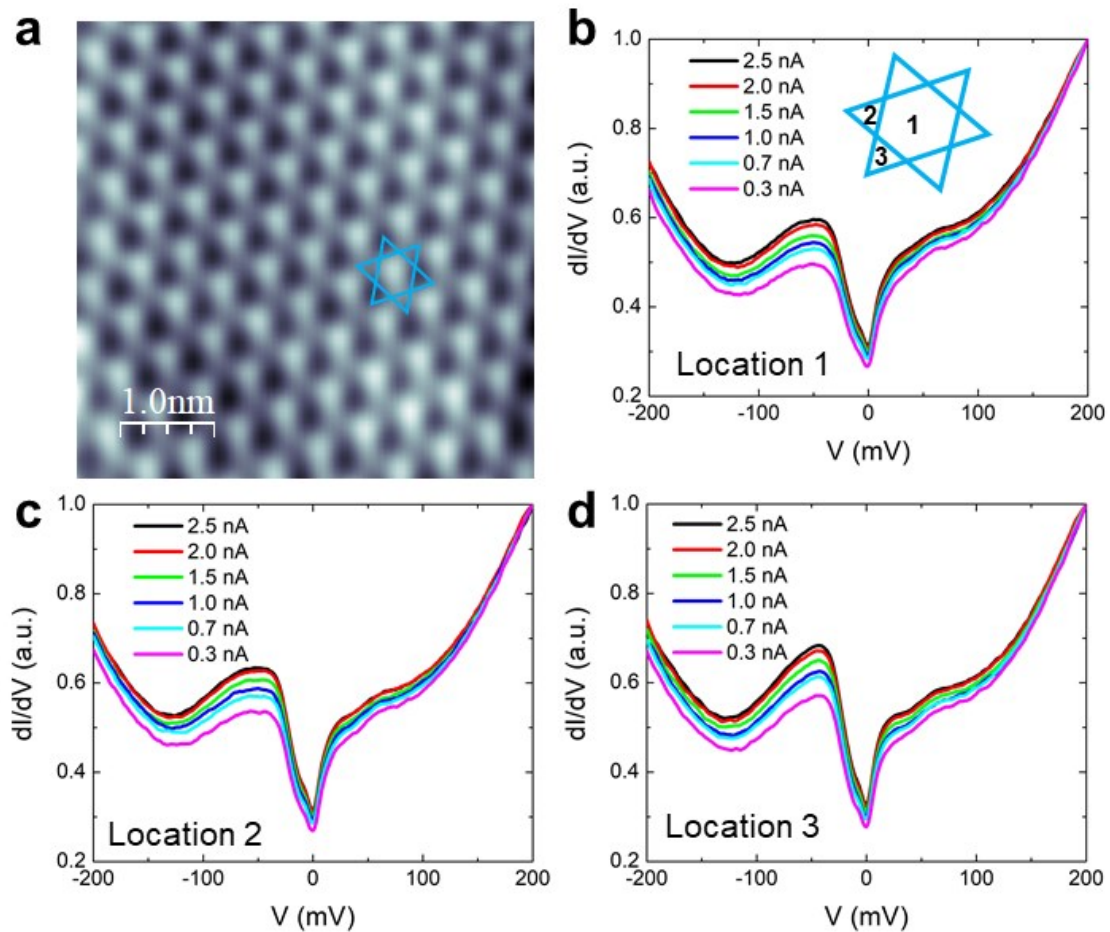

**Figure S3. Setpoint-dependent  $dI/dV$  spectra.** **a**, Topographic STM image of  $\text{Fe}_3\text{Sn}$  Kagome layer. Setpoint:  $V = 200$  mV. **b-c**,  $dI/dV$  spectra taken at three typical locations labeled as 1, 2, and 3 in the inset of **b**. The tunneling current is varied from 0.3 nA to 2.5 nA.

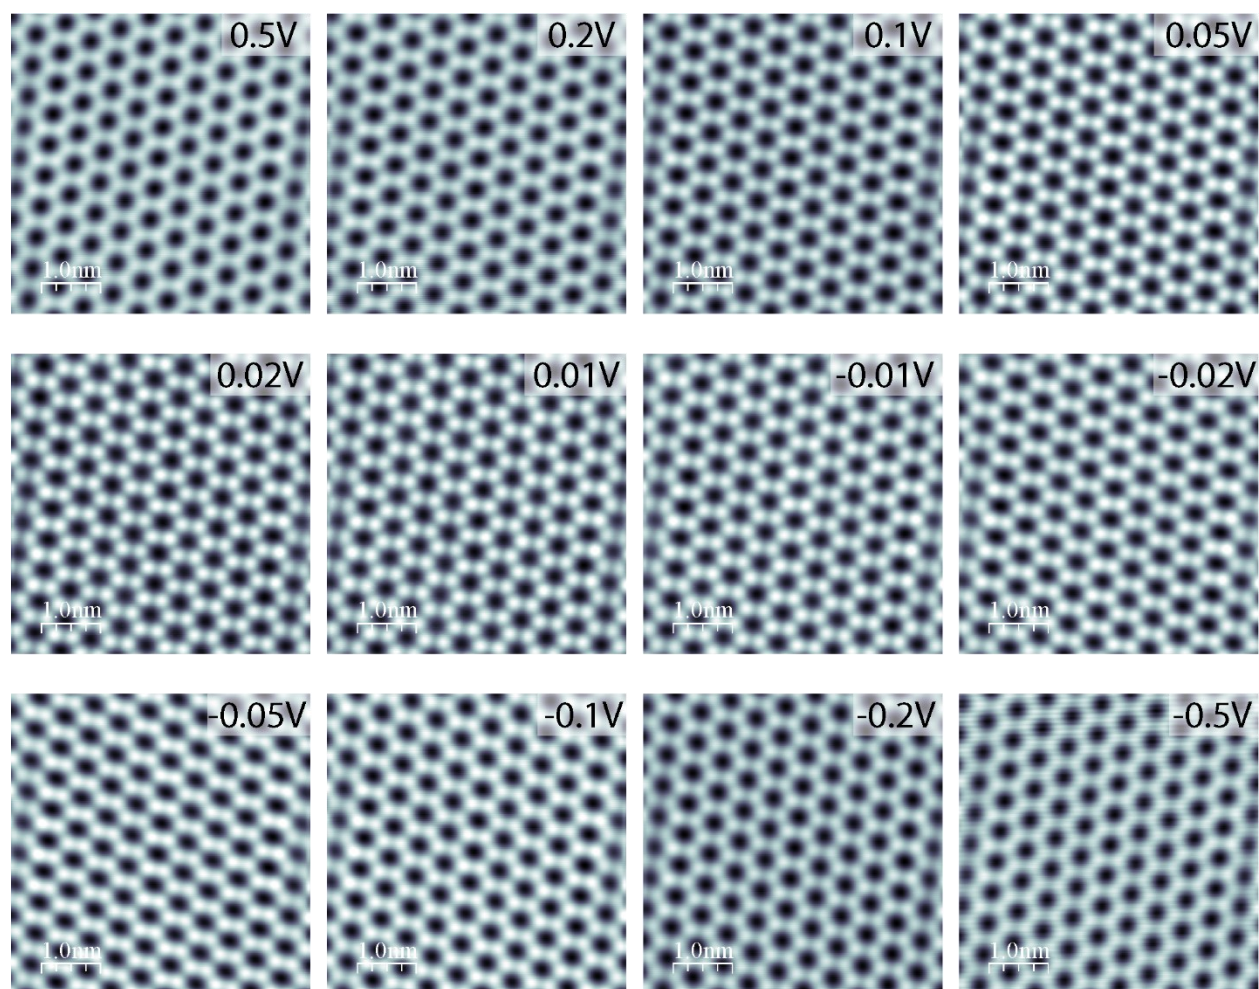

**Figure S4. Bias-dependent STM imaging of the Sn honeycomb lattice.** STM images of the Sn honeycomb structure on FeSn film's Sn-termination at the specified bias voltage. Setpoint:  $I = 5.0$  nA.

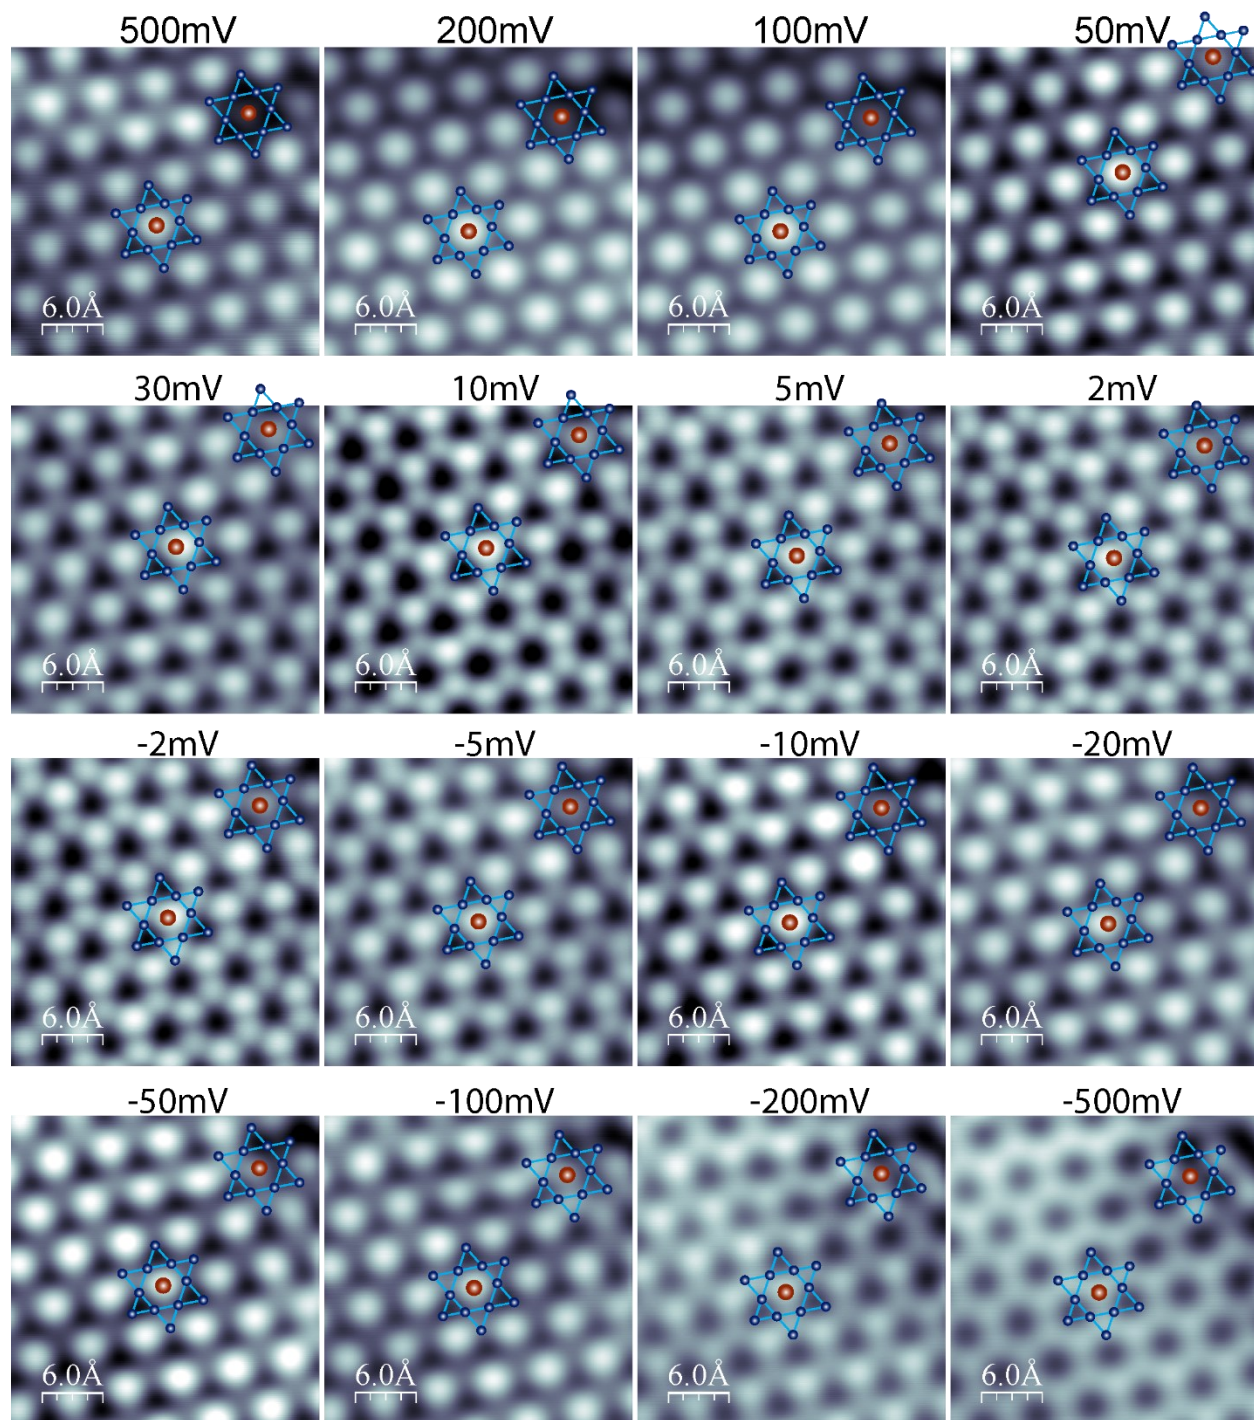

**Figure S5. Bias-dependent STM imaging of the  $\text{Fe}_3\text{Sn}$  Kagome lattice.** STM images of the  $\text{Fe}_3\text{Sn}$ -termination at the bias voltage specified. Setpoint:  $I = 3.0$  nA. The ball-and-stick model of the Kagome lattice is overlaid on the surface. An Sn vacancy at the up-right corner is used as a reference to assign the atomic lattice.

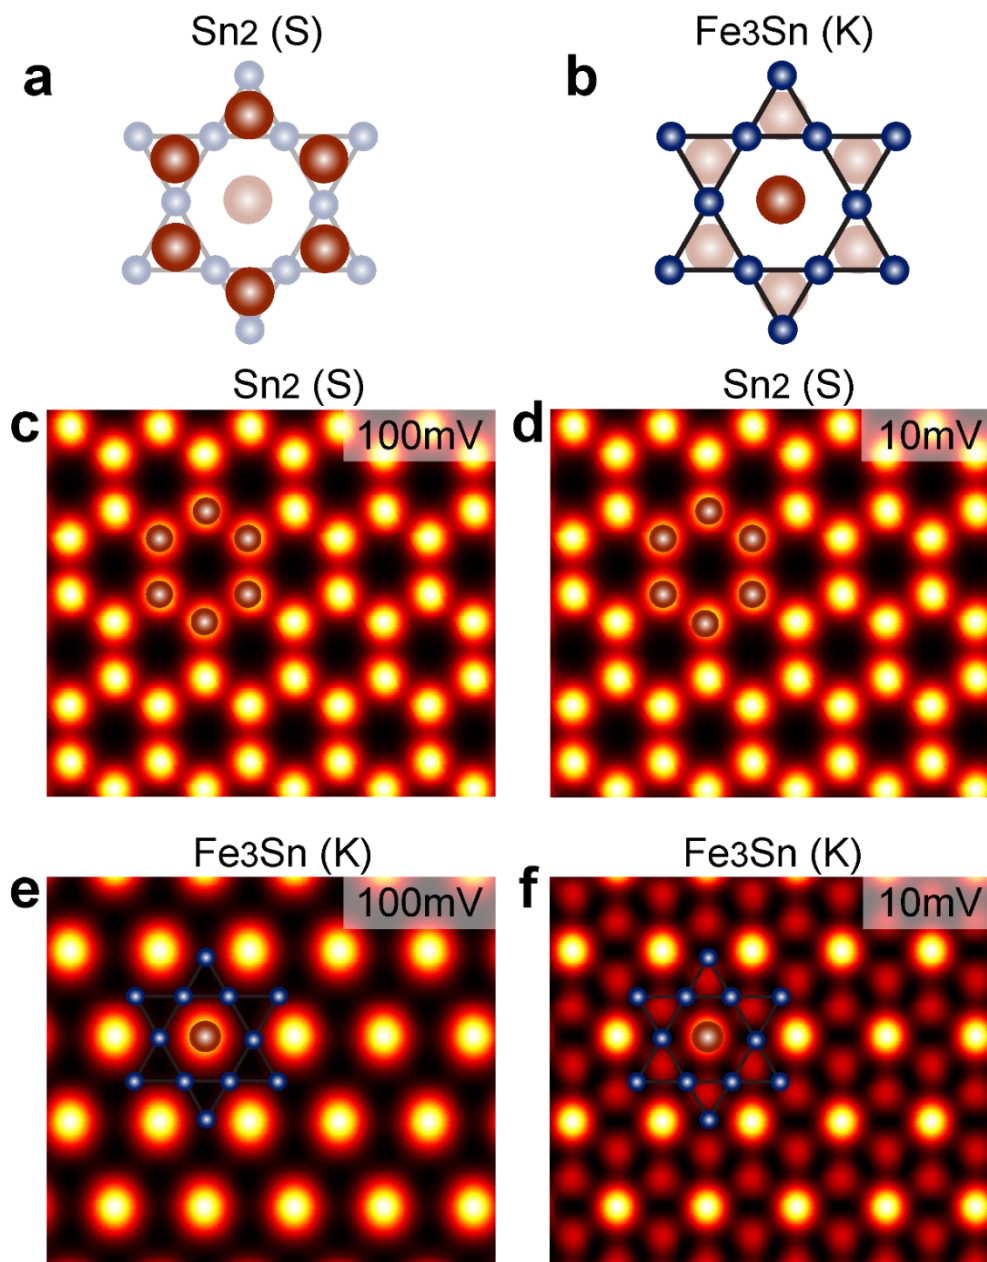

**Figure S6. Simulated STM imaging of the Sn<sub>2</sub> (S) and Fe<sub>3</sub>Sn (K) terminations by DFT. a,** Schematic Sn<sub>2</sub> (S) layer with underlying K layer. The K layer is demonstrated in transparency. **b,** Schematic Fe<sub>3</sub>Sn (K) layer with underlying S layer. **c-d,** Simulation of Sn<sub>2</sub> (K) layer under different bias. **e-f,** Simulation of Fe<sub>3</sub>Sn (K) layer under different bias. The band alignment is based on the comparison with STM images and DFT simulation.

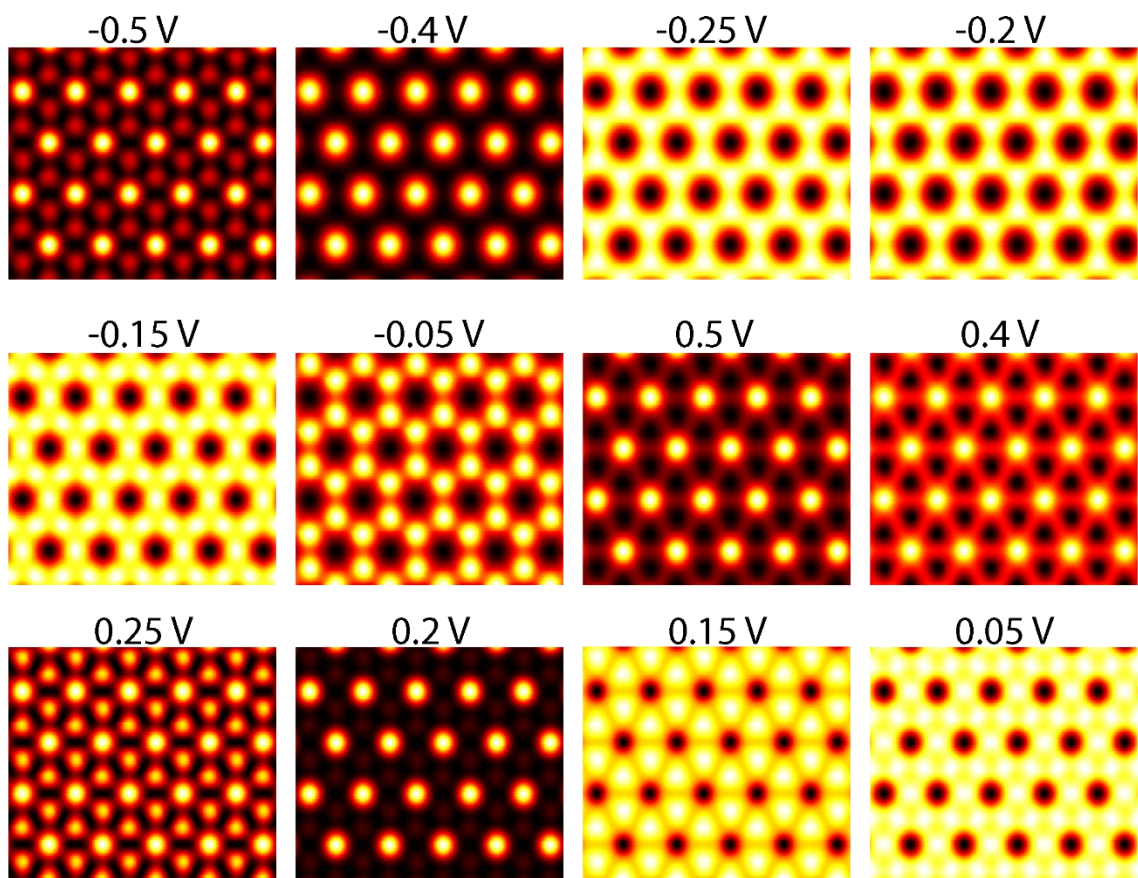

Figure S7. Simulation of the Fe<sub>3</sub>Sn termination (K layer) at energies marked by DFT.



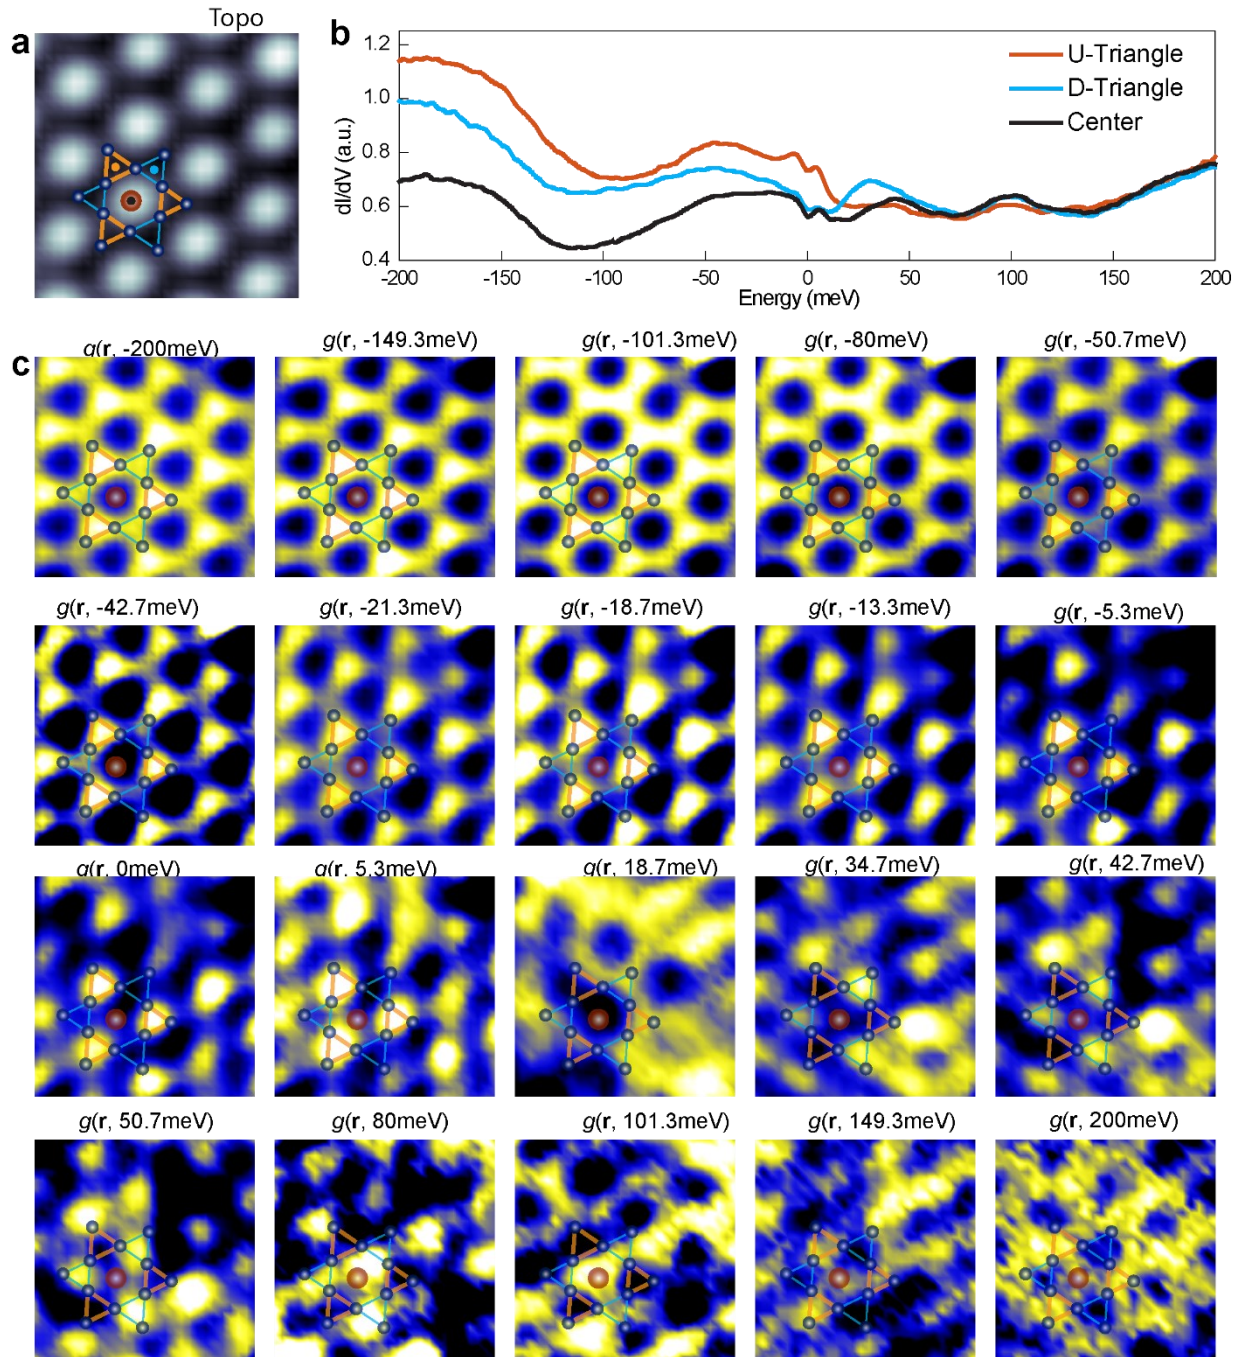

**Figure S8. Differential conductance  $dI/dV$  mapping of the  $\text{Fe}_3\text{Sn}$  Kagome lattice.** **a**, Topographic STM image of  $\text{Fe}_3\text{Sn}$  Kagome lattice. Setpoint:  $V = 0.2$  V,  $I = 5.0$  nA. **b**, Typical  $dI/dV$  spectra taken at up-triangle, down-triangle, and center sites. Setpoint:  $V = 0.2$  V,  $I = 5.0$  nA. **c**,  $dI/dV$  maps at the energies indicated. Setpoint:  $V = 0.2$  V,  $I = 5.0$  nA. The Kagome lattice is overlaid on the topographic image and  $dI/dV$  maps.

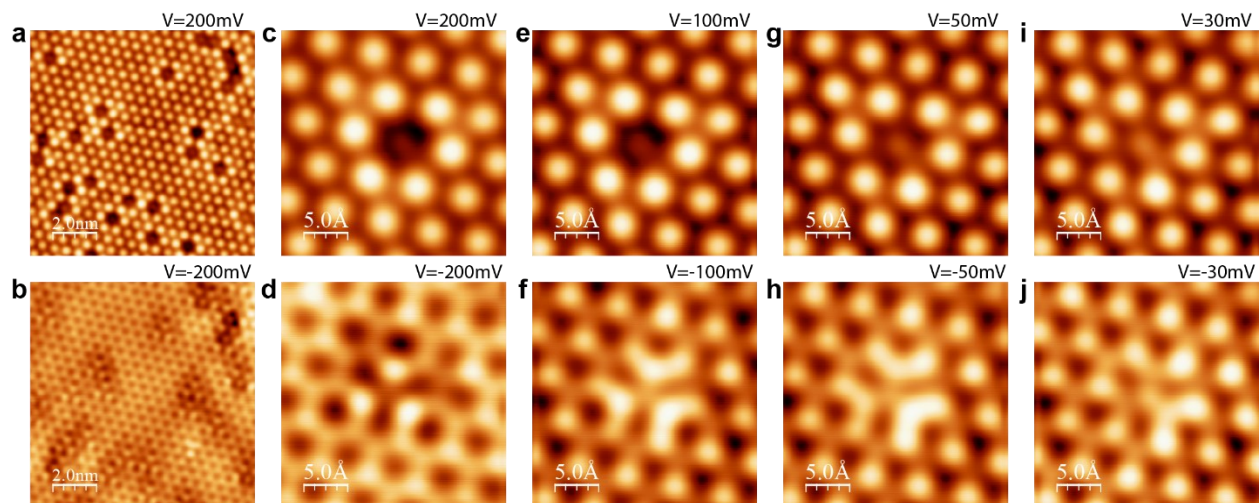

**Figure S9. Bias-dependent STM imaging of the Sn vacancy defect on the Kagome lattice. a-b,** Large scale STM image of  $\text{Fe}_3\text{Sn}$  layer with Sn vacancies. Setpoint:  $I = 5.0$  nA with  $V$  labeled. **c-j,** Closed-up view of a single vacancy defect at the bias indicated. Setpoint:  $I = 3.0$  nA.

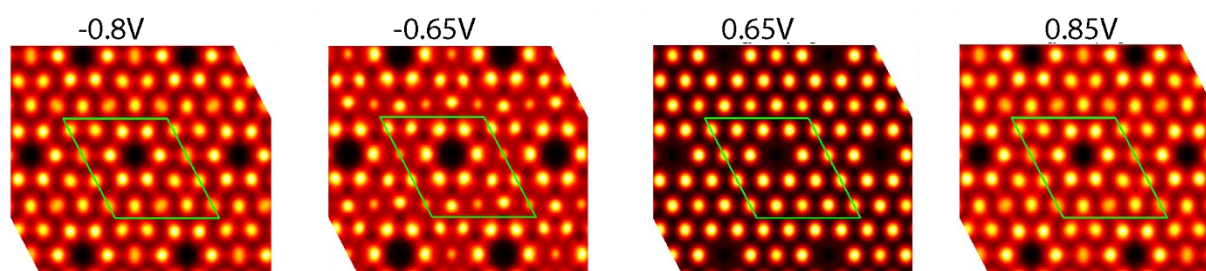

**Figure S10. Simulated STM images of the Sn vacancy defect on the  $\text{Fe}_3\text{Sn}$  layer by DFT at the energies indicated.**

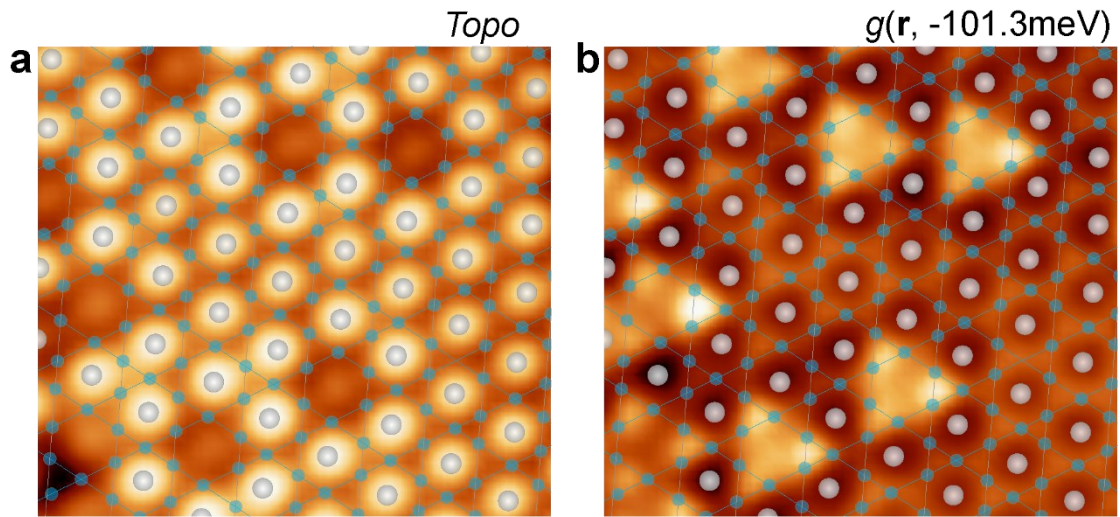

**Figure S11. Spatial distribution of the bound states induced by an Sn vacancy on the Kagome layer.** **a**, Topographic STM image of  $\text{Fe}_3\text{Sn}$  with vacancies. Lower contrast is observed at the missing Sn atoms. Setpoint:  $V = 0.2\text{ V}$ ,  $I = 5.0\text{ nA}$ . **b**, Differential conductance  $dI/dV$  map  $g(\mathbf{r}, -101.3\text{meV})$ . The Kagome lattice is overlaid on both, where gray and blue balls denote Sn and Fe atoms. The contrast at three alternating triangles is enhanced by bound states.

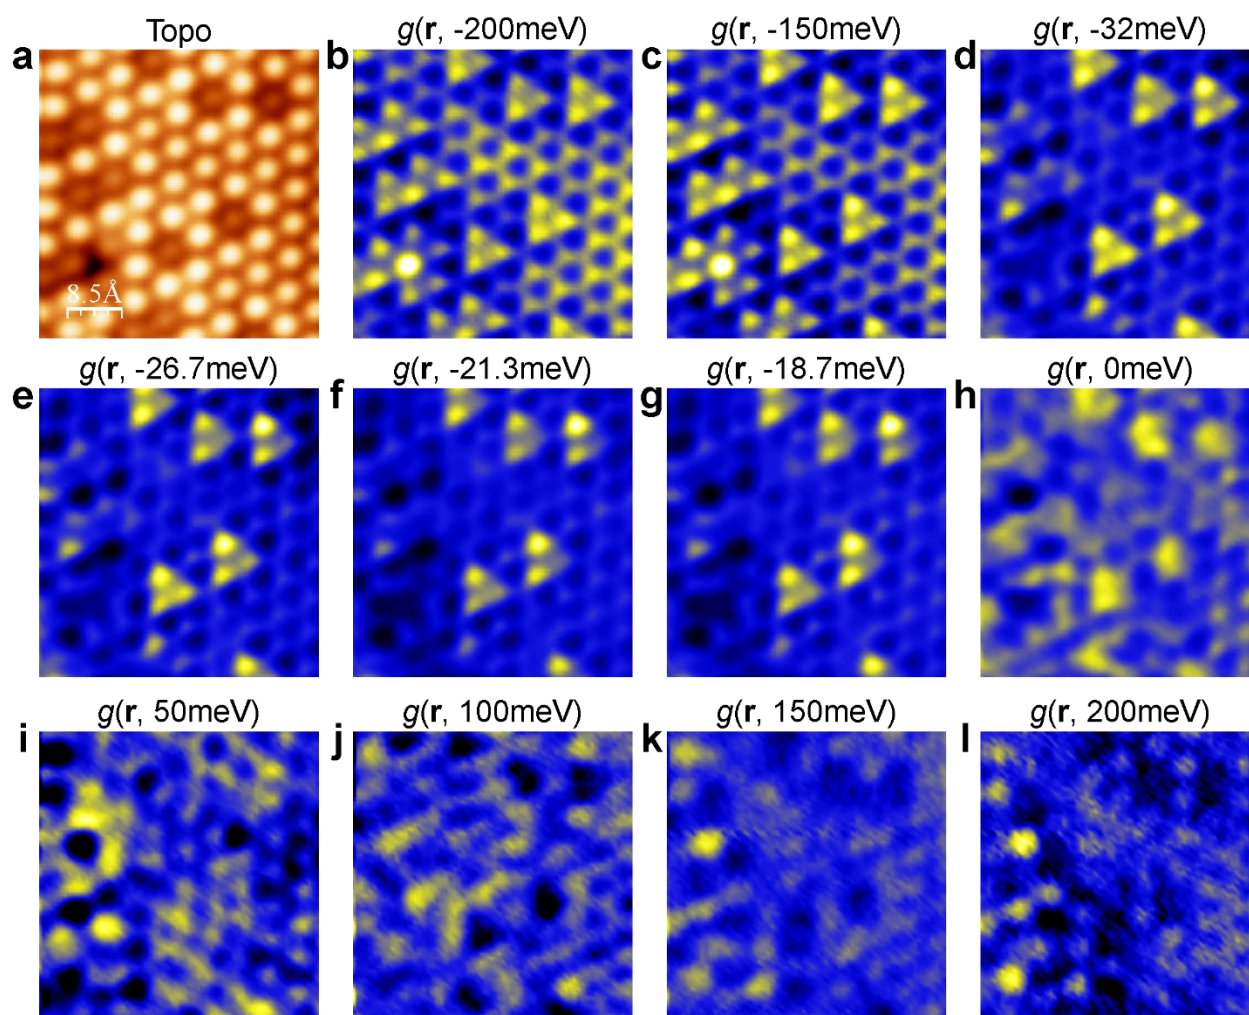

**Figure S12. Energy-dependent  $dI/dV$  maps of the  $\text{Fe}_3\text{Sn}$  Kagome layer with Sn vacancies.** a, Topographic STM image of the Kagome layer with Sn vacancies. Setpoint:  $V = 0.2$  V,  $I = 5.0$  nA. b-l, The corresponding  $dI/dV$  maps with energy specified, setpoint:  $V = 0.2$  V,  $I = 5.0$  nA,  $V_{mod} = 3.0$  meV.

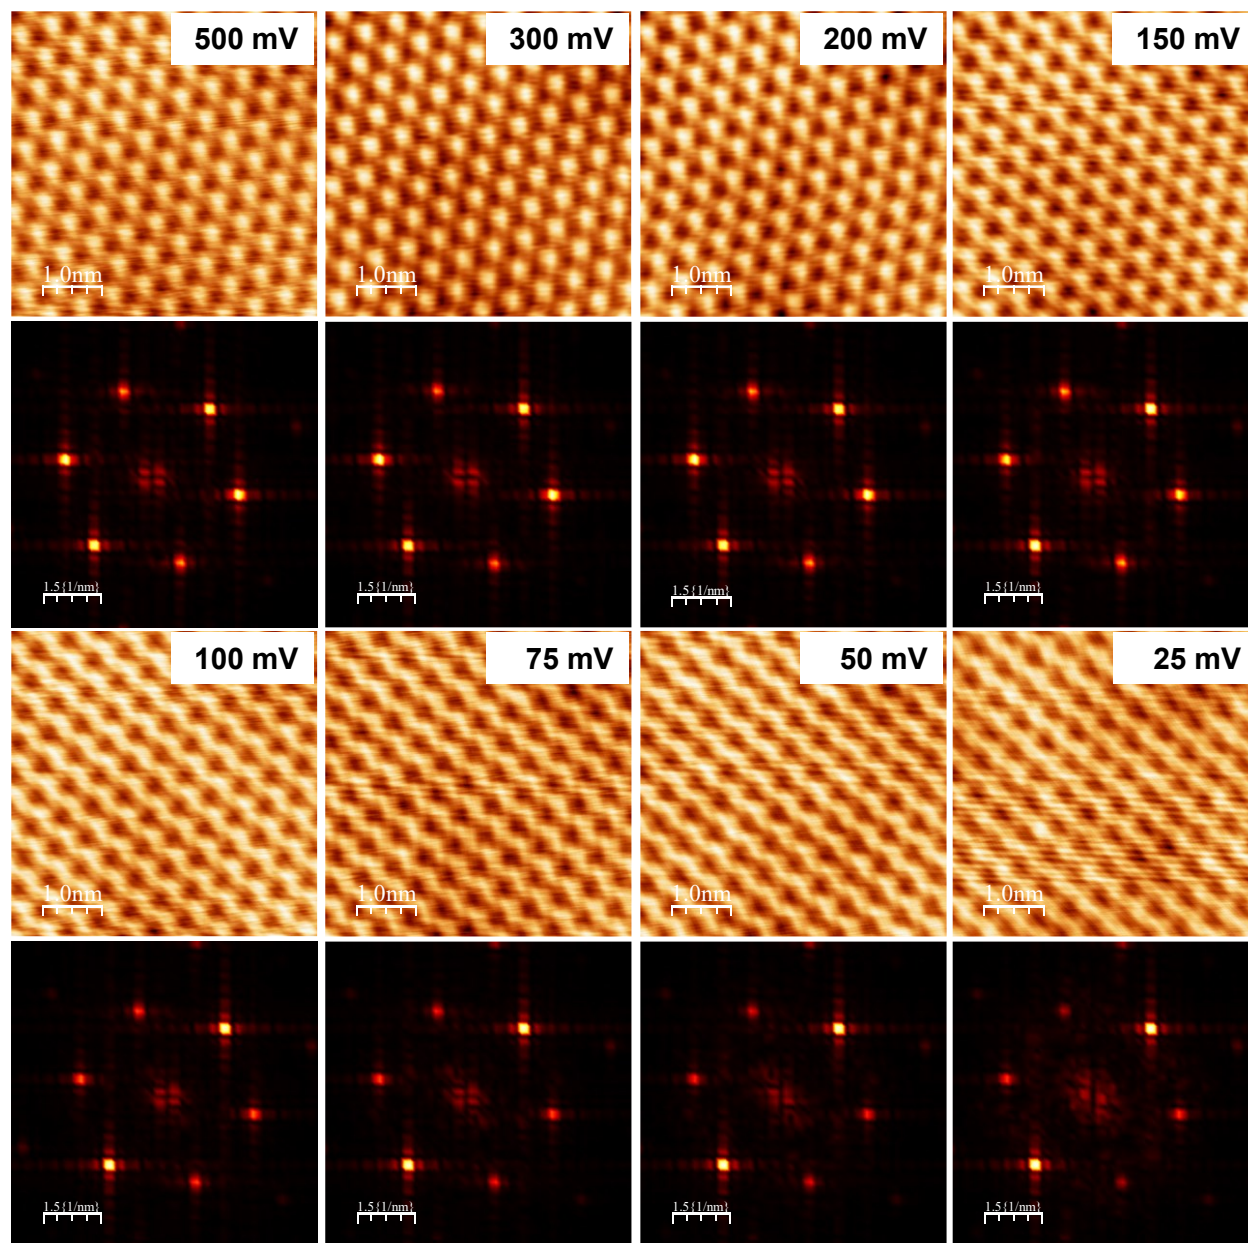

**Figure S13 Bias-dependent atomic resolution STM images of the Kagome layer and their corresponding FFTs. The bias is indicated in each image.  $I_{\text{set}} = 500$  pA.**

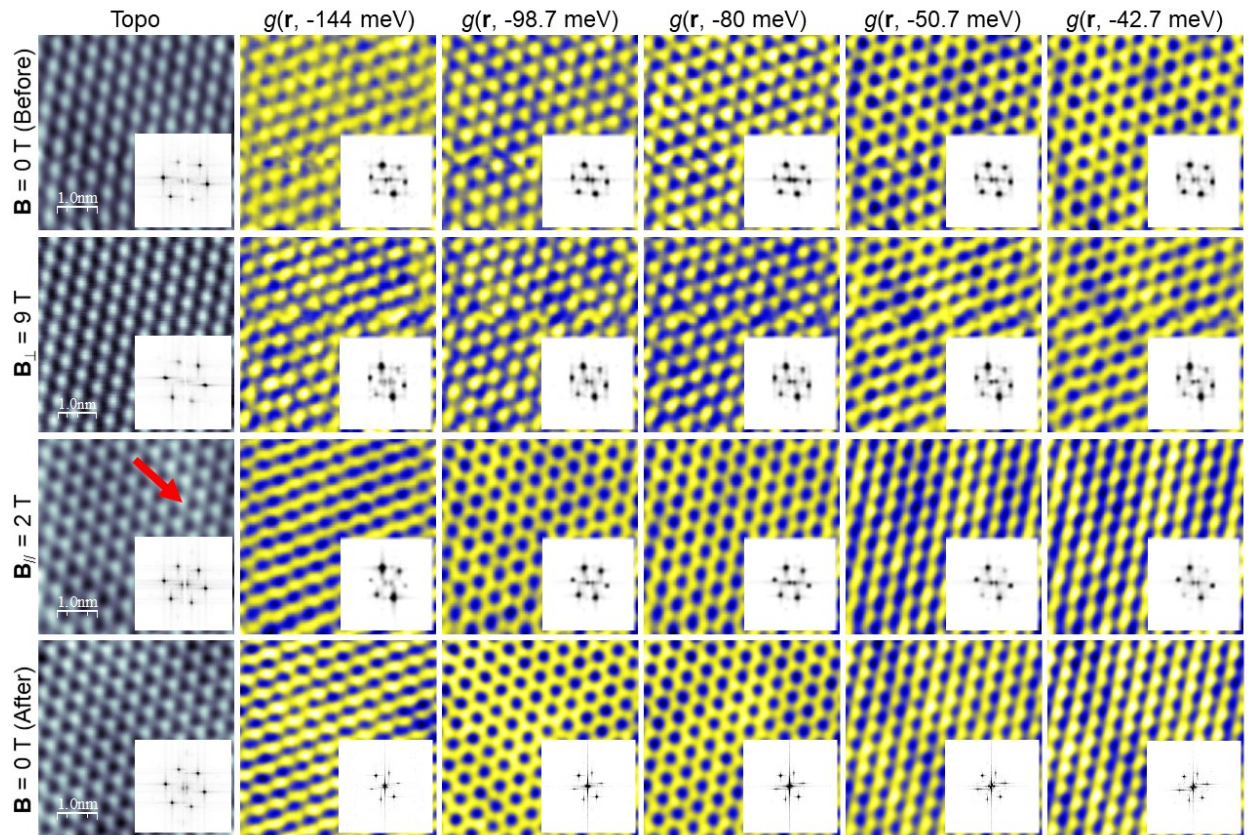

**Figure S14. Comparison of  $dI/dV$  maps under zero field and vertical and in-plane magnetic fields.**  $dI/dV$  maps at the energy specified under  $\mathbf{B} = 0$  T,  $\mathbf{B}_\perp = 9$  T, and  $\mathbf{B}_\parallel = 2$  T. Setpoint:  $V = 0.2$  V,  $I = 0.7$  nA. The red arrow marks the direction of the in-plane magnetic field  $B = 2$  T

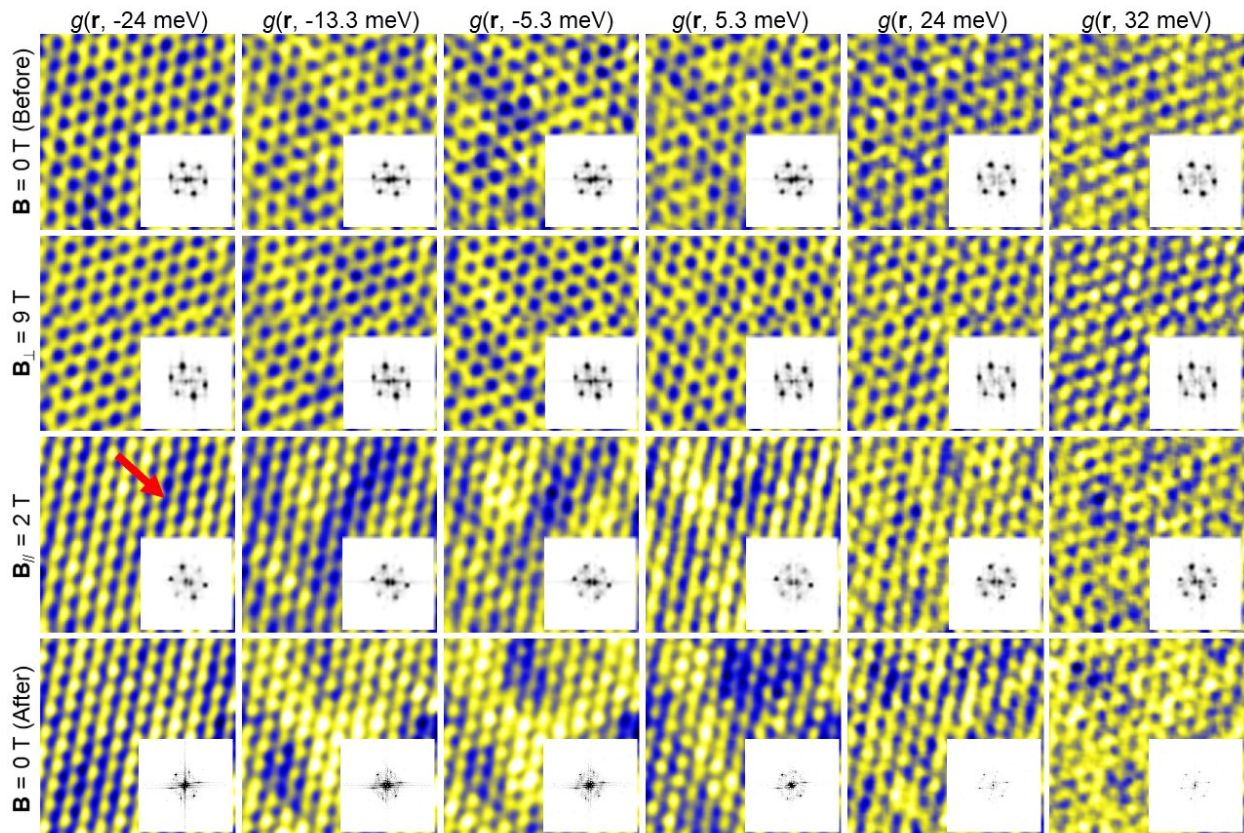

**Figure S15. Comparison of  $dI/dV$  maps under zero field and vertical and in-plane magnetic fields.**  $dI/dV$  maps at the energy specified under  $\mathbf{B} = 0$  T,  $\mathbf{B}_\perp = 9$  T, and  $\mathbf{B}_\parallel = 2$  T. Setpoint:  $V = 0.2$  V,  $I = 0.7$  nA. The red arrow marks the direction of the in-plane magnetic field  $B = 2$  T.

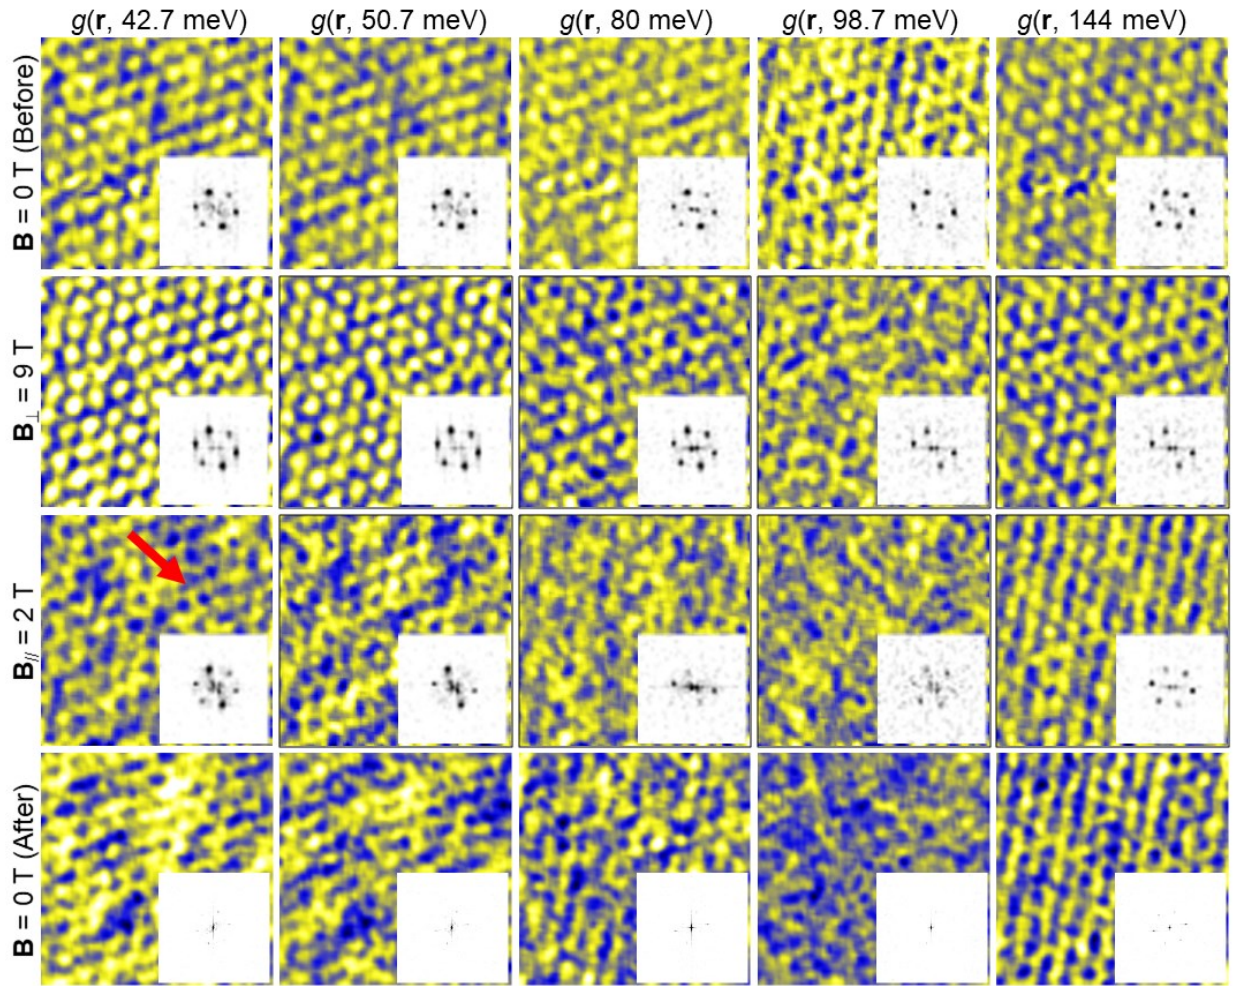

**Figure S16. Comparison of  $dI/dV$  maps under zero field and vertical and in-plane magnetic fields.**  $dI/dV$  maps at the energy specified under  $\mathbf{B} = 0$  T,  $\mathbf{B}_\perp = 9$  T, and  $\mathbf{B}_\parallel = 2$  T. Setpoint:  $V = 0.2$  V,  $I = 0.7$  nA. The red arrow marks the direction of the in-plane magnetic field  $\mathbf{B} = 2$  T.



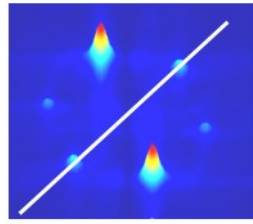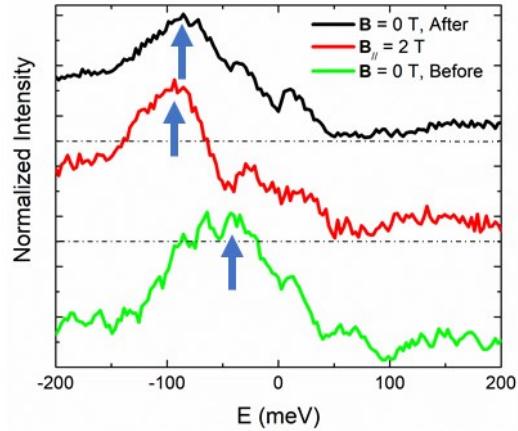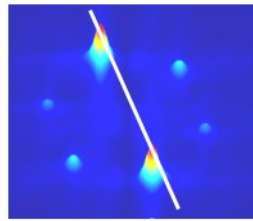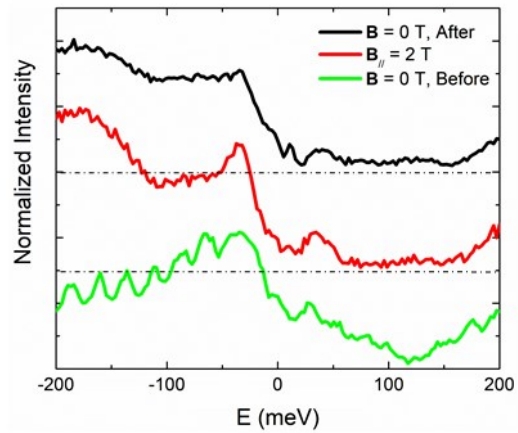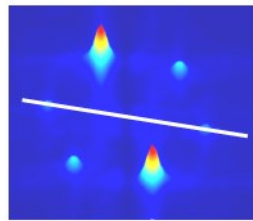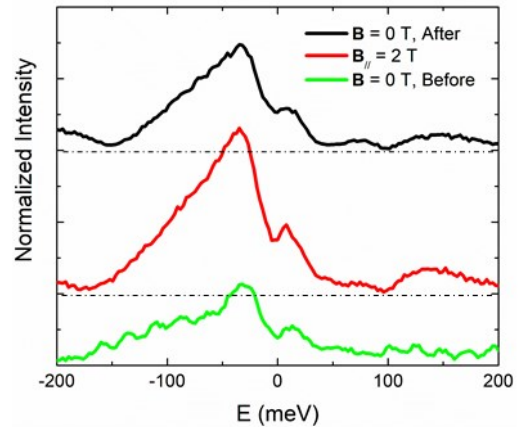

**Figure S17. Comparison of FFT peak intensity under zero- and in-plane magnetic fields.** FFT peak intensity along the three crystallographic directions as an energy function for all the  $dI/dV$  maps at zero and applied parallel fields. The data at  $B_{||} = 2$  T (red curve) and  $B = 0$  T, after (black curve) are shifted vertically. The FFT peak intensity is normalized to their corresponding averaged background intensity.

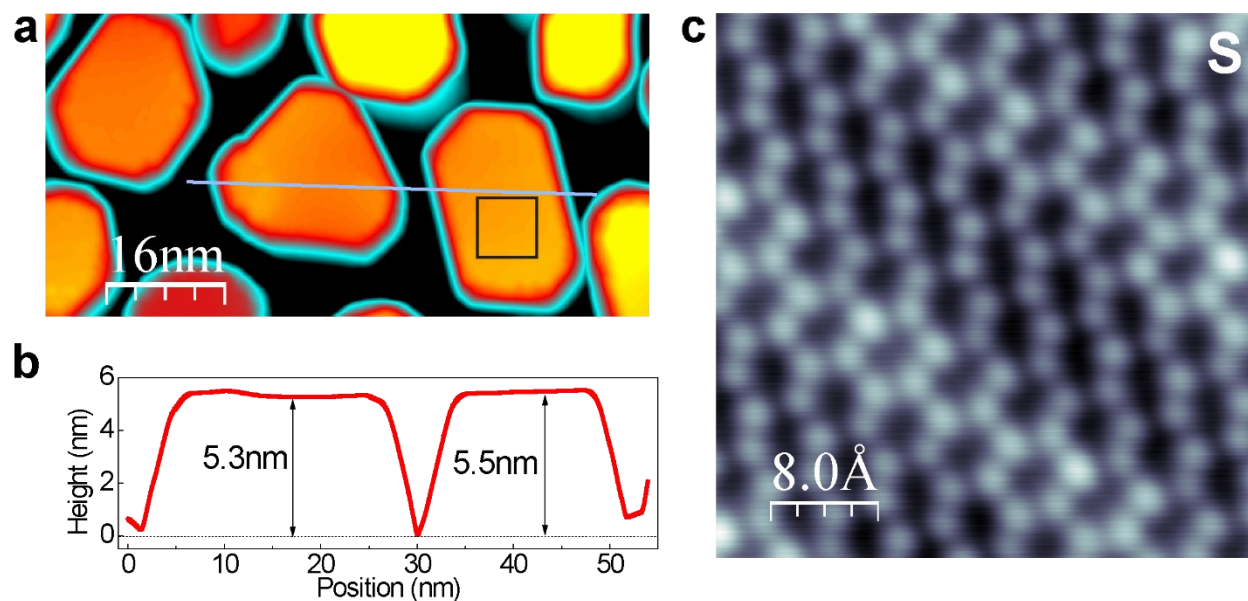

**Figure S18. The distorted Sn honeycomb on a strained 5 nm FeSn/STO(111) film.** **a**, Topographic STM image of strained FeSn films epitaxial on SrTiO<sub>3</sub>(111) substrate, setpoint:  $V = 1.5$  V,  $I = 10$  pA. **b**, Line profile along the cyan line in **a**. **c**, Atomic resolution image taken in the boxed region in **a**, showing the distorted Sn honeycomb and stripes. Setpoint:  $V = 30$  mV,  $I = 5.0$  nA.

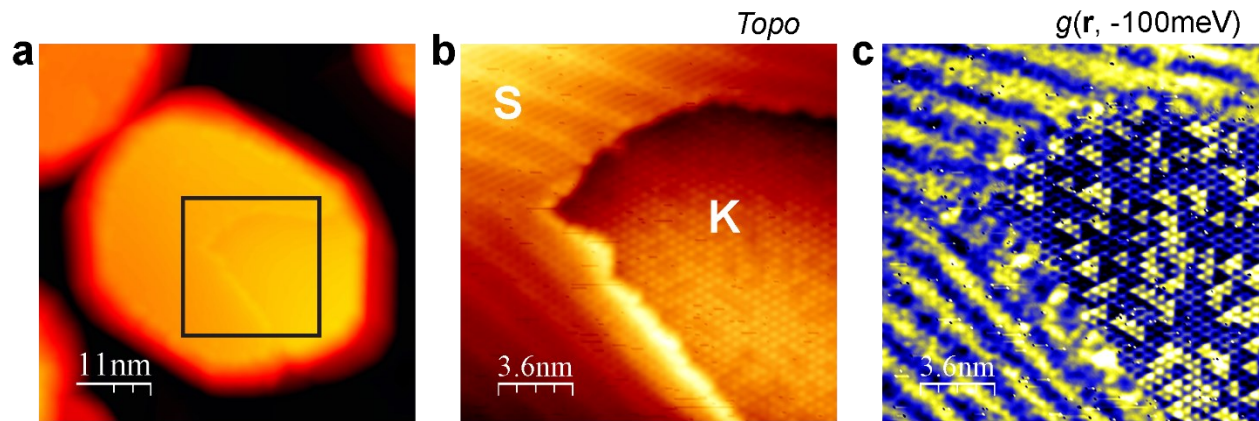

**Figure S19. Two terminations in a strained FeSn/STO(111) island.** **a**, Topographic STM image of a FeSn island on SrTiO<sub>3</sub>(111) substrate, setpoint:  $V = 3.0$  V,  $I = 10$  pA. The thickness of the island is 6.1 nm. **b**, Topographic STM image of the boxed region in **a**, showing both the honeycomb (S) and Kagome (K) terminations. Stripes are observed on the S layer. Set point:  $V = 0.1$  V,  $I = 5.0$  nA. **c**, dI/dV map of the region **b**. Setpoint:  $V = 0.1$  V,  $I = 5.0$  nA,  $V_{mod} = 2$  meV. The S layer shows stripe modulations in both topography (**b**) and dI/dV map (**c**), while the K layer exhibits a close-packed structure in topography (**b**) and trimerization in dI/dV map (**c**).
